# Supplementary material for: In Vitro HIV-1 Evolution in Response to Triple Reverse Transcriptase Inhibitors & In Silico Phenotypic Analysis
Source: PLOS journal article supplement (doi:10.1371/journal.pone.0061102), 2013-04-17
Supplement: S2 (10.1371/journal.pone.0061102.s002) [file journal.pone.0061102.s002]

# Input

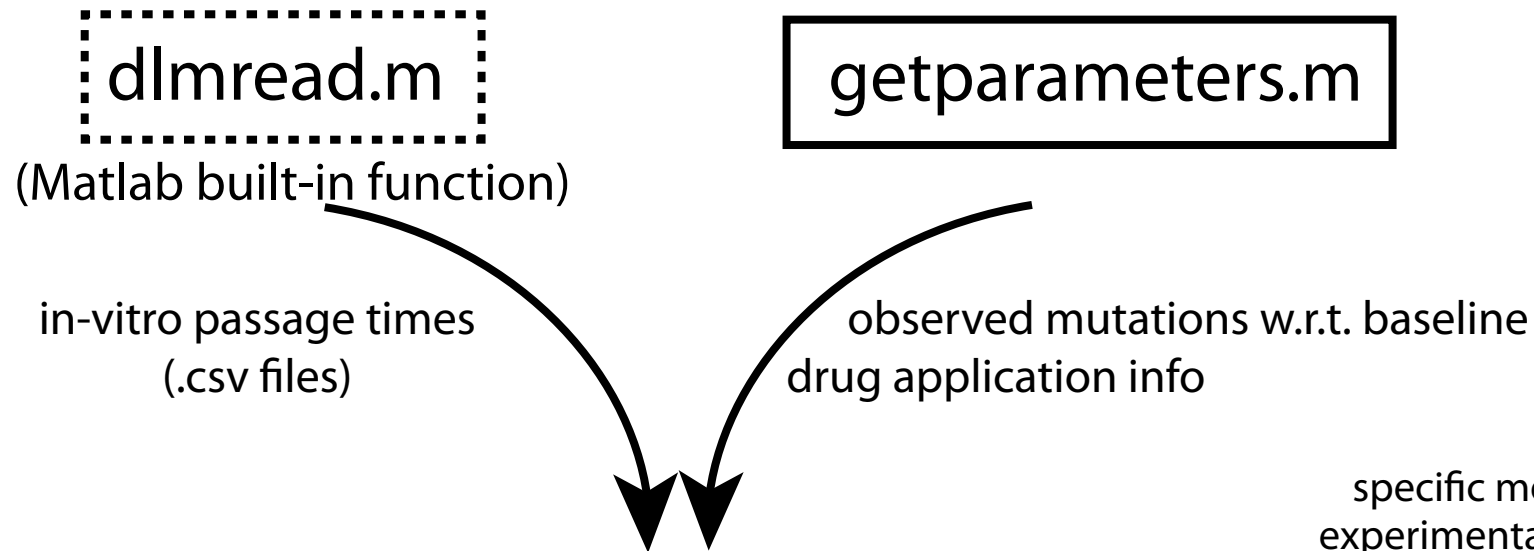

# Parameter Optimization

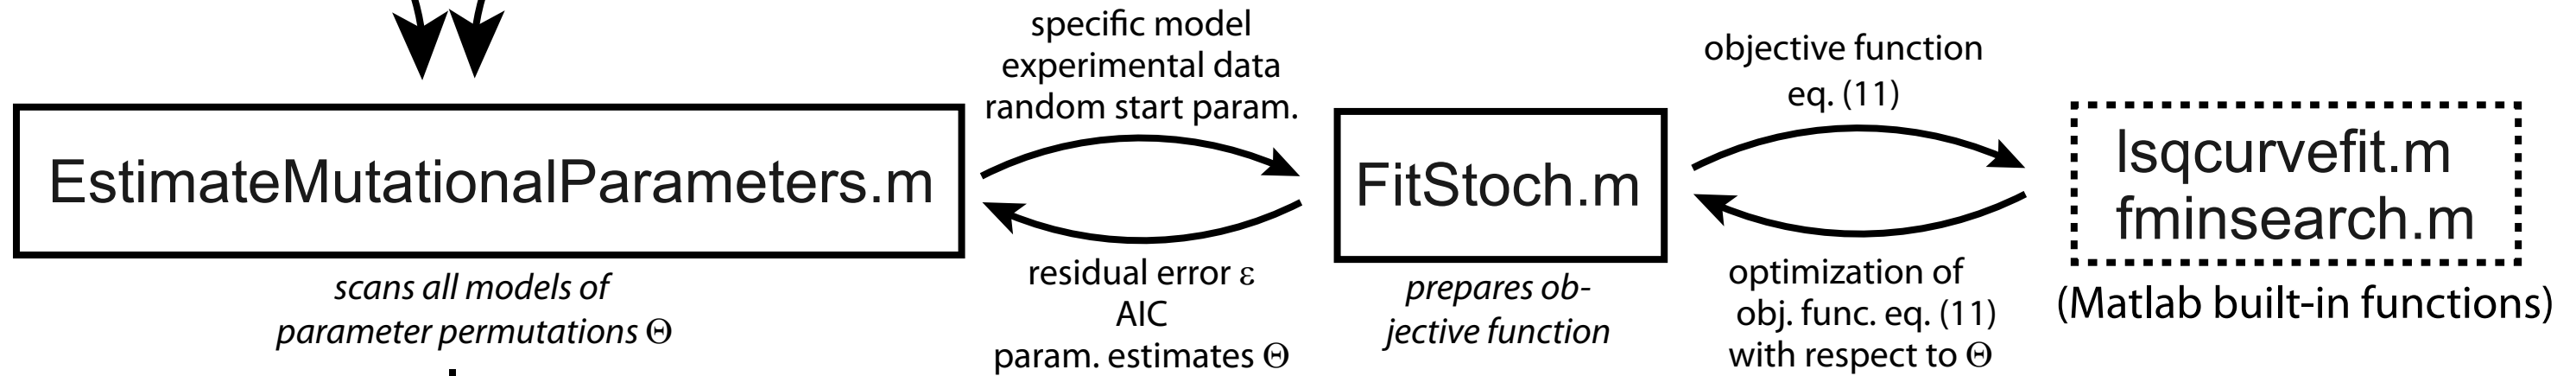

# Results & Statistics

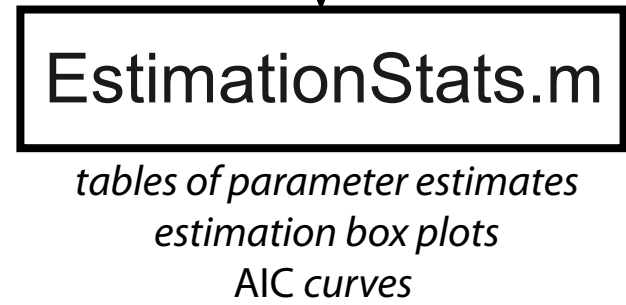

parameter estimation for isolate # x

| model #          | AIC | $\varepsilon$ | $r_\phi$ | IC <sub>50</sub> | f(q) |     |     | FR(q) |      |     |
|------------------|-----|---------------|----------|------------------|------|-----|-----|-------|------|-----|
|                  |     |               |          |                  | 184V | 67S | ... | 106A  | 106M | ... |
| 1                |     |               |          |                  |      |     |     |       |      |     |
| 2                |     |               |          |                  |      |     |     |       |      |     |
| :                | :   | :             | :        | :                | :    | :   | :   | :     | :    | :   |
| <b>mean</b>      |     |               |          |                  |      |     |     |       |      |     |
| <b>median</b>    |     |               |          |                  |      |     |     |       |      |     |
| <b>percentl.</b> |     |               |          |                  |      |     |     |       |      |     |

stored in 'EstimationResults.mat'  
and 'parEstStats.out'

shown in Tables 2-4
