# Supplementary material for: In Vitro HIV-1 Evolution in Response to Triple Reverse Transcriptase Inhibitors & In Silico Phenotypic Analysis
Source: PLOS journal article supplement (doi:10.1371/journal.pone.0061102), 2013-04-17
Supplement: S3 (10.1371/journal.pone.0061102.s003) [file journal.pone.0061102.s003]

## Application of the computational method

The experimental data used for parameter estimation consisted of a) the mean duration of the passage experiments  $j$   $\bar{\mu}_{\text{exp}}(j)$  and their standard deviation  $\bar{\sigma}_{\text{exp}}(j)$  (see Fig. 3) and b) the respective types of mutations and reversions  $q$  that occurred (see Fig. 1; these mutational events gave rise to the respective candidate models  $\Theta_i$ ).

In order to use the programmes provided in supplementary material S3, start “EstimateMutationalParameters.m” in MATLAB<sup>®</sup>. The program imports the experimental data (passage times, mutations) and generates candidate models  $\Theta_i$  for parameter estimation. For each candidate model  $\Theta_i$ , parameters are estimated 50-times using eq. (11) with random initial values. Estimated parameters and goodness-of-fit (in terms of the residual error  $\varepsilon(\Theta_i)$ ) for each candidate model are written into an output file. The program “EstimationStats.m” can then be used in order to derive statistics for the estimated parameters.
